# Supplementary material for: Reproducible breath metabolite changes in children with SARS-CoV-2 infection
Source: bioRxiv or medRxiv preprint supplement (doi:10.1101/2020.12.04.20230755), 2021-05-07
Supplement: Supplementary file [file media-1.pdf]

**Breath biomarkers of pediatric SARS-CoV-2 infection: a pilot study**

Amalia Z. Berna<sup>1</sup>, Elikplim H. Akaho<sup>1</sup>, Rebecca M. Harris<sup>1,2</sup>, Morgan Congdon<sup>1,2</sup>, Emilie Korn<sup>1,2</sup>, Samuel Neher<sup>1,2</sup>, Mirna M'Farrej<sup>1,2</sup>, Julianne Burns<sup>1,2</sup>, Audrey R. Odom John<sup>1,2</sup>

<sup>1</sup>Department of Pediatrics, Children's Hospital of Philadelphia, Philadelphia, Pennsylvania, USA

<sup>2</sup>Perelman School of Medicine, University of Pennsylvania, Philadelphia, Pennsylvania, USA

## Materials and Methods

### Thermal Desorption and GCxGC parameters

Before analysis, sorbent tubes were brought to room temperature and loaded into autosampler (Ultra-xr, Markes International, UK). A gaseous standard mixture (1.01 ppm Bromochloromethane, 1.04 ppm 1,4-Difluorobenzene, 1.04 ppm Chlorobenzene-D5, 0.96 ppm 4-bromofluorobenzene) was added to each tube immediately prior to analysis. Followed by a purge pre-desorption step consisting of 10 min with He at  $50 \text{ mL} \cdot \text{min}^{-1}$  to remove water content in breath samples. Tubes were thermally desorbed for 10 min at  $270^\circ\text{C}$  (Unity-xr, Markes International, UK) and transferred to a "Universal" cold trap which matched the sorbent of the sample tubes, held at  $10^\circ\text{C}$  and subsequently heated to  $300^\circ\text{C}$ , to minimize band broadening. The split flow after the cold trap was  $15 \text{ mL} \cdot \text{min}^{-1}$ .

Analysis by two-dimensional gas chromatography was conducted using an Agilent 7890B GC system, fitted with a flow modulator and a three-way splitter plate coupled to a flame ionisation detector and a time-of-flight mass spectrometer with electron ionization (SepSolve, UK). Chromatographic analysis was performed using a Stabilwax ( $30 \text{ m} \times 250 \mu\text{m ID} \times 0.25 \mu\text{m df}$ ) as the first dimension (1D)-GC column and a Rtx-200 MS ( $5 \text{ m} \times 250 \mu\text{m ID} \times 0.1 \mu\text{m df}$ ) as second dimension (2D)-GC column, both purchased from Restek (Bellefonte, PA, US). The following GC oven temperature program was used: initial temperature  $40^\circ\text{C}$  and held for 1 min, ramped to  $260^\circ\text{C}$  at  $3^\circ\text{C} \cdot \text{min}^{-1}$ . The final temperature of  $260^\circ\text{C}$  was held for 1 min. The total run time for the analysis was 75 min. Helium carrier gas was flowed at a rate of  $1.2 \text{ mL} \cdot \text{min}^{-1}$ . The flow modulator (Insight, SepSolve Analytical, UK) had a loop with dimensions  $0.53 \text{ mm i.d.} \times 110 \text{ mm length}$  (loop volume: 25  $\mu\text{L}$ ), and the modulation time was 2 s total.

## **TOF-MS Conditions**

The GCxGC was interfaced with a BenchTOF-select time-of-flight mass spectrometer (SepSolve Analytical, UK). The acquisition speed was 50 Hz and mass range was 30-400 m/z. The ion source and transfer line were set at 250 °C and 270 °C respectively and filament voltage at 1.6 V. Electron ionization energy was 70 eV. ChromSpace (SepSolve Analytical, UK) was used to synchronize and control the INSIGHT modulator, thermal desorption, GC, and TOF.

## **Chemical standards and solutions**

Nonanal, octanal, heptanal, tridecane, and 2-pentylfuran and isoprene were purchased from Sigma-Aldrich (St. Louis, MO, US). Dodecane was purchased from Merck (Darmstadt, Germany). To spike the compound of interest into a sorbent tube, a 10 ppm solution was prepared in HPLC grade methanol. Using a solution loading rig (Markes International Limited, UK), 1 µL of the solution was spiked into a sorbent tube. The sorbent tube was flushed for 3 min with nitrogen at a flow of 100 mL.min<sup>-1</sup>. All the stock solutions were stored in glass vials and kept at 4 °C. Sorbent tubes containing standards were analyzed by GCxGC BenchTOF-MS following the same protocols as described below for breath samples.

## **Quality control**

Breath concentration of the canonical human volatile isoprene was performed to quality control for correct breath sampling, as a small or missing isoprene peak indicates an error in the sample collection and/or analysis, resulting in data being excluded. To check for changes in instrument sensitivity over time, a mixture of external standards was analyzed with the GCxGC

BenchTOF-MS alongside the breath samples as described previously (1). Briefly, we analyzed an external standard before running each batch of breath samples. The standard used was EPA 8240B Calibration Mix (2-Butanone, Isobutanol, 4-methyl-2-pentanone and 2-hexanone). One mL 2000  $\mu\text{g}\cdot\text{mL}^{-1}$  vial standards were purchased from Sigma-Aldrich. To spike the mixture into a sorbent tube, a 100  $\mu\text{g}\cdot\text{mL}^{-1}$  solution was prepared in HPLC grade methanol. Using a solution loading rig (Markes International Limited, UK), 1  $\mu\text{L}$  of the solution was spiked into a sorbent tube. The sorbent tube was flushed for 3 min with nitrogen at a flow of 100  $\text{mL}\cdot\text{min}^{-1}$  and analyzed by GCxGC BenchTOF-MS.

**Table S1.** VOC biomarkers selected as best discriminants between SARS-Cov-2 positive and controls (SARS-Cov-2 negative) patients, together with analytical characteristics of each compound.

| Compound Name   | Formula                          | Structure                                                                          | NIST match | Rt <sub>1</sub> | Rt <sub>2</sub> |
|-----------------|----------------------------------|------------------------------------------------------------------------------------|------------|-----------------|-----------------|
| Octanal         | C <sub>8</sub> H <sub>16</sub> O | 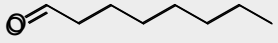  | 804        | 24.3            | 0.73            |
| Nonanal         | C <sub>9</sub> H <sub>18</sub> O |   | 839        | 28.8            | 0.73            |
| Dodecane        | C <sub>12</sub> H <sub>24</sub>  |   | 846        | 19.8            | 1.18            |
| Furan, 2-pentyl | C <sub>9</sub> H <sub>14</sub> O |   | 674        | 21.5            | 0.49            |
| Heptanal        | C <sub>7</sub> H <sub>14</sub> O |   | 762        | 19.7            | 0.7             |
| Tridecane       | C <sub>13</sub> H <sub>28</sub>  |  | 801        | 24.7            | 1.11            |

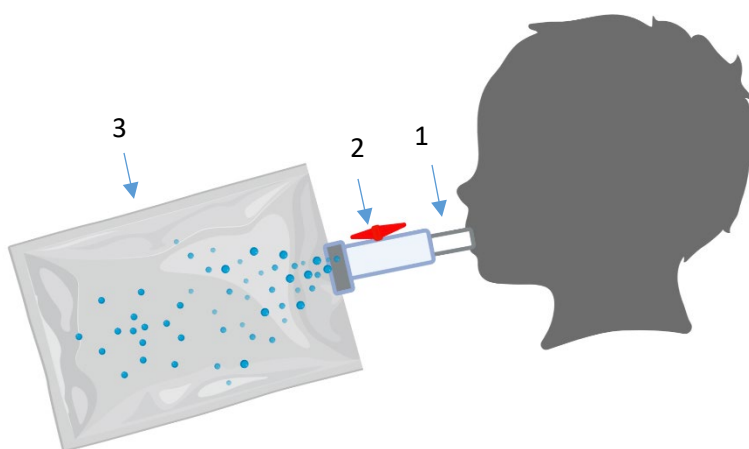

**Figure S1. Breath collection system for children.** To collect breath, child places mouthpiece (1) between the lips and exhales completely. Volatiles are transferred from two-way valve (2) to SamplePro FlexFilm sample bag (3).

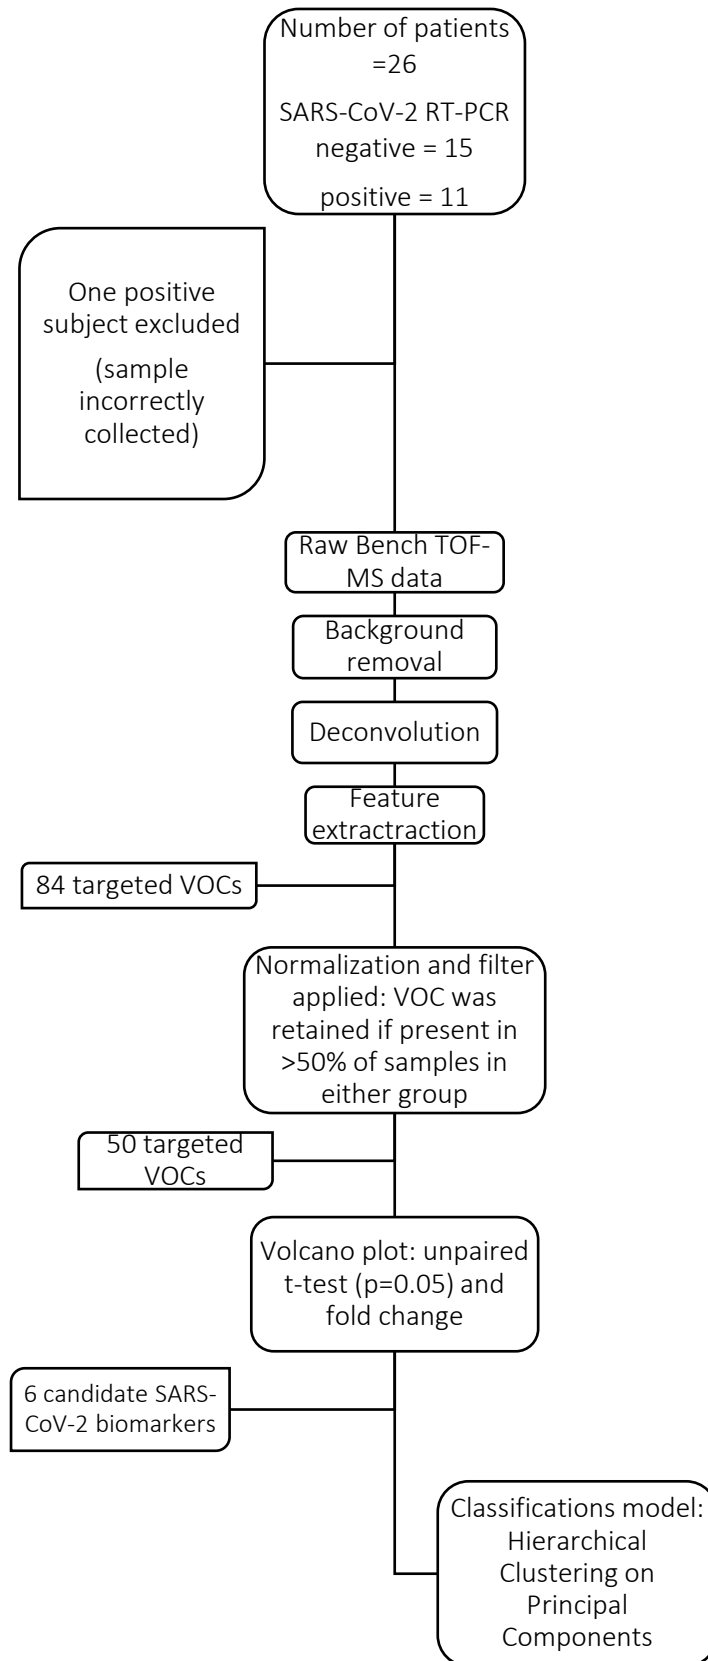

**Figure S2: Workflow of data analysis and statistics used to create a final multivariate model to discriminate SARS-CoV-2-infected from -uninfected subjects.**

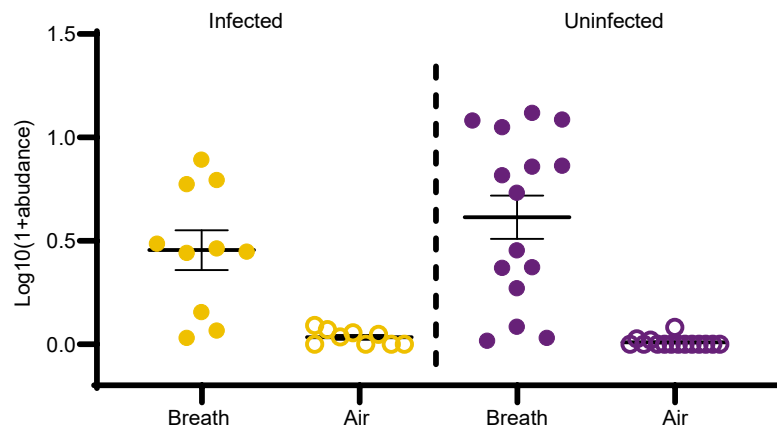

**Figure S3. Isoprene is significantly more abundant in breath samples compared to room air.** Higher levels of isoprene were found in breath compared room air in both SARS-CoV-2-infected and -uninfected breath samples. Median with SEM are shown.



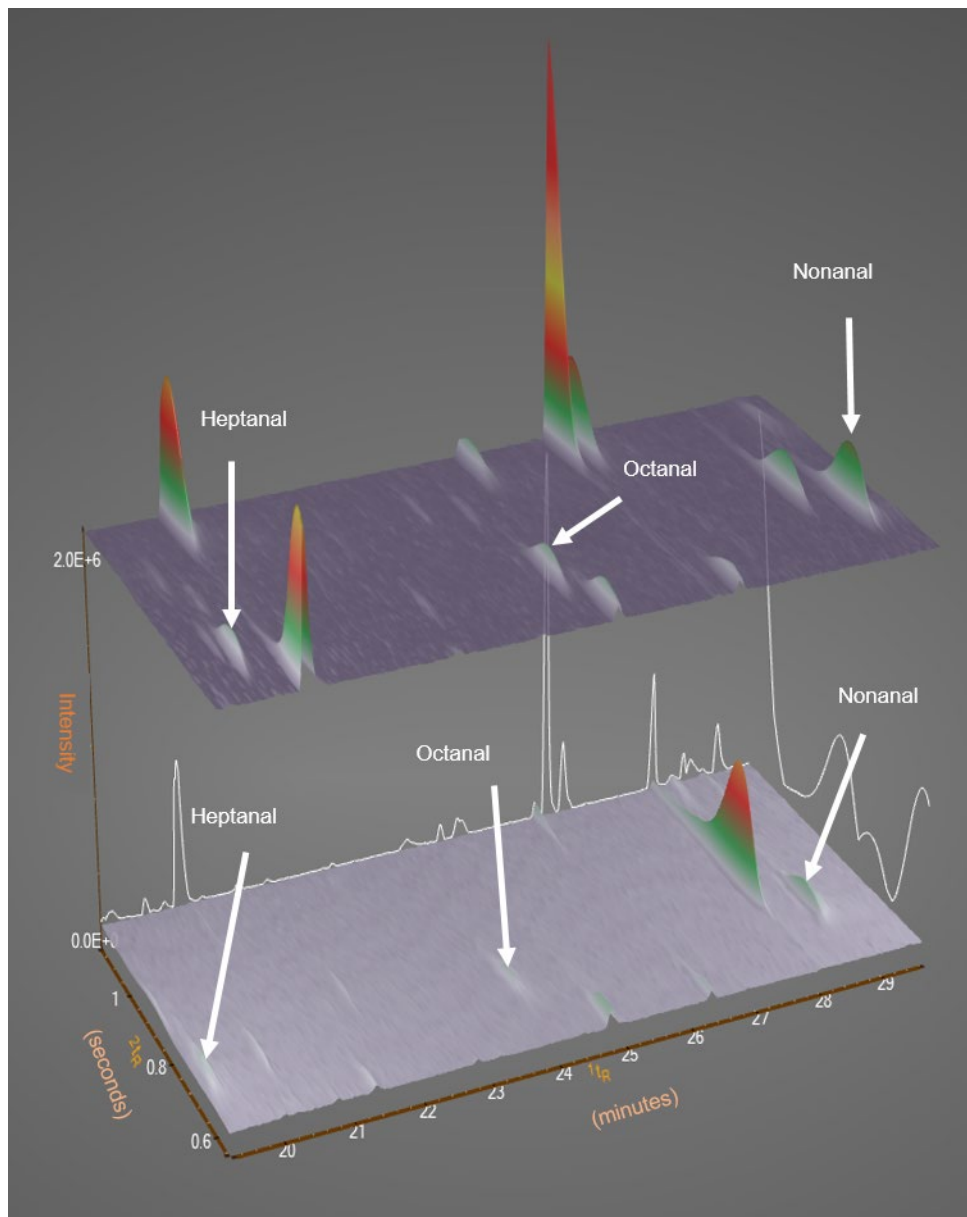

**Figure S4. Example of 3D GxGC ToF-MS surface plots of two breath samples: SARS-CoV-2 infected (top) and uninfected (bottom). 1t<sub>R</sub> retention time in minutes and 2t<sub>R</sub> in seconds.**

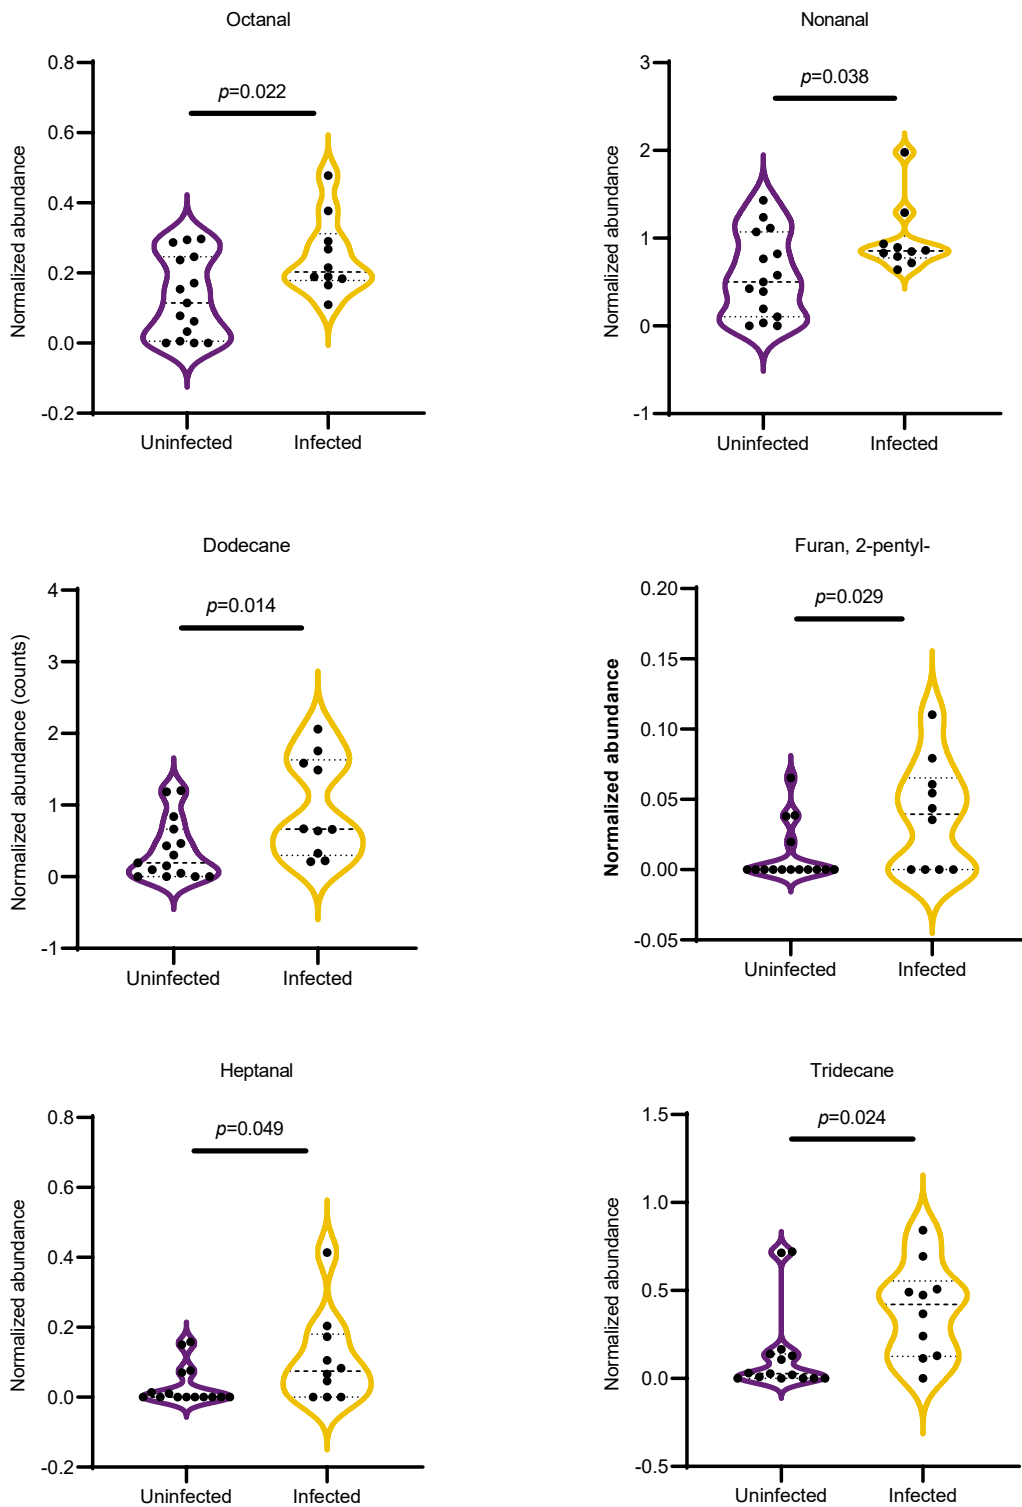

**Figure S5. Breath abundance of candidate SARS-CoV-2 biomarker in uninfected and infected children.** Median and quartiles are shown. P-values from t-tests are shown for each comparison.

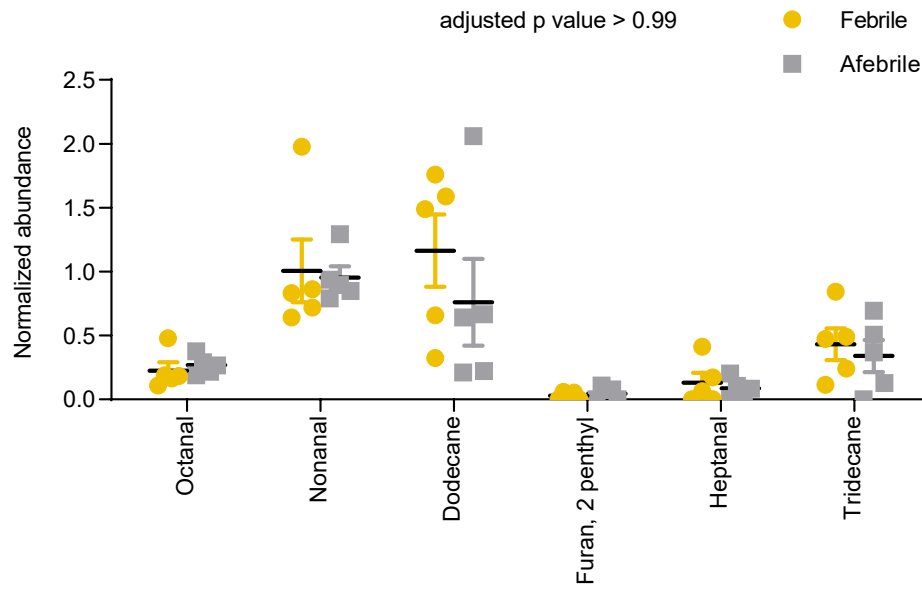

**Figure S6. Breath abundance of candidate SARS-CoV-2-associated biomarkers are not significantly different between febrile and afebrile SARS-CoV-2 patients.**

## References:

1. Wang XR, Cassells J, and Berna AZ. Stability control for breath analysis using GC-MS. *J Chromatogr B*. 2018;1097-1098:27-34.
